# Supplementary material for: Citrus peel extract protects against diesel exhaust particle-induced chronic obstructive pulmonary disease-like lung lesions and oxidative stress
Source: Royal Society of Chemistry journal article supplement (doi:10.1039/d3fo02010j), 2023-01-01
Supplement: d3fo02010j1.pdf [file d3fo02010j1.pdf]

## Electronic Supplementary Material

**Primer sequences using in this study were as follows.**

(1) IL8: (F) 5'-TTTTGCCAAGGAGTGCTAAAGA-3';

(R) 5'-AACCCCTCTGCACCCAGTTTTTC-3'.

(2) MUC5AC: (F) 5'-ACGGCACCTACTACACCTTCCTG-3';

(R) 5'-CCGCACCGCAGAAGTAGTTGTC-3'.

(3) GAPDH: (F) 5' -CCT CCA AGG AGT AAG ACC CC-3'

(R) 5' -AGG GGT CTA CAT GGC AAC TG-3' .

## Supplementary figure 1

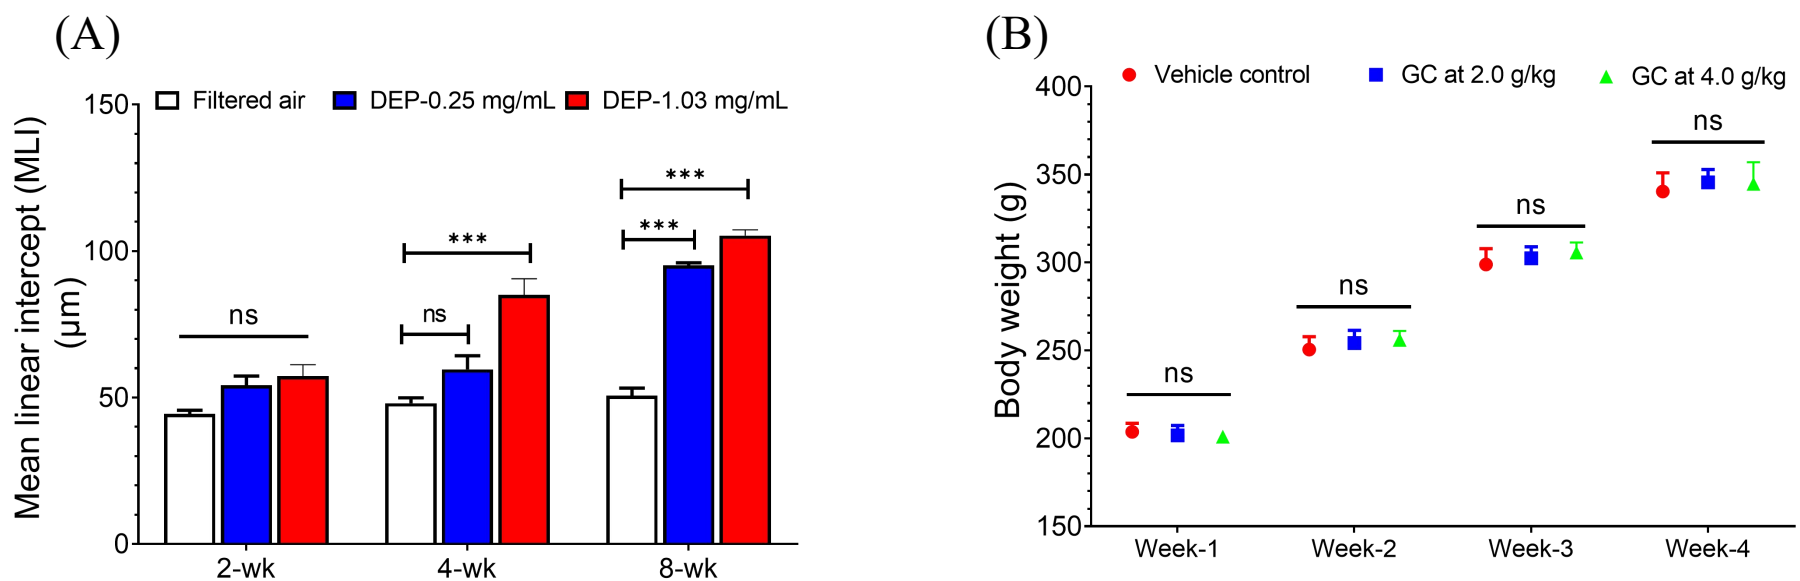

**Fig. S1:** (A) Compared to the filtered air control, rat exposed to DEP at both levels for 2-week did not increase the MLI (an indicator of emphysema). DEP exposure for 4-week, at the level of 1.03 mg/m<sup>3</sup>, resulted in a significant increase of MLI in alveoli (emphysema-like change). While DEP exposure for 8-week, at both levels (0.25 mg/m<sup>3</sup> and 1.03 mg/m<sup>3</sup>), induced significant increases in MLI. ns, not significant; \*\*\*  $p < 0.001$ . n=6 rats/group. (B) From week-1 to week-4, the body weight in rats treated with GC extract at both dosages did not differ significantly from that of the vehicle control. ns, not significant. n=6 rats/group.

## Supplementary figure 2

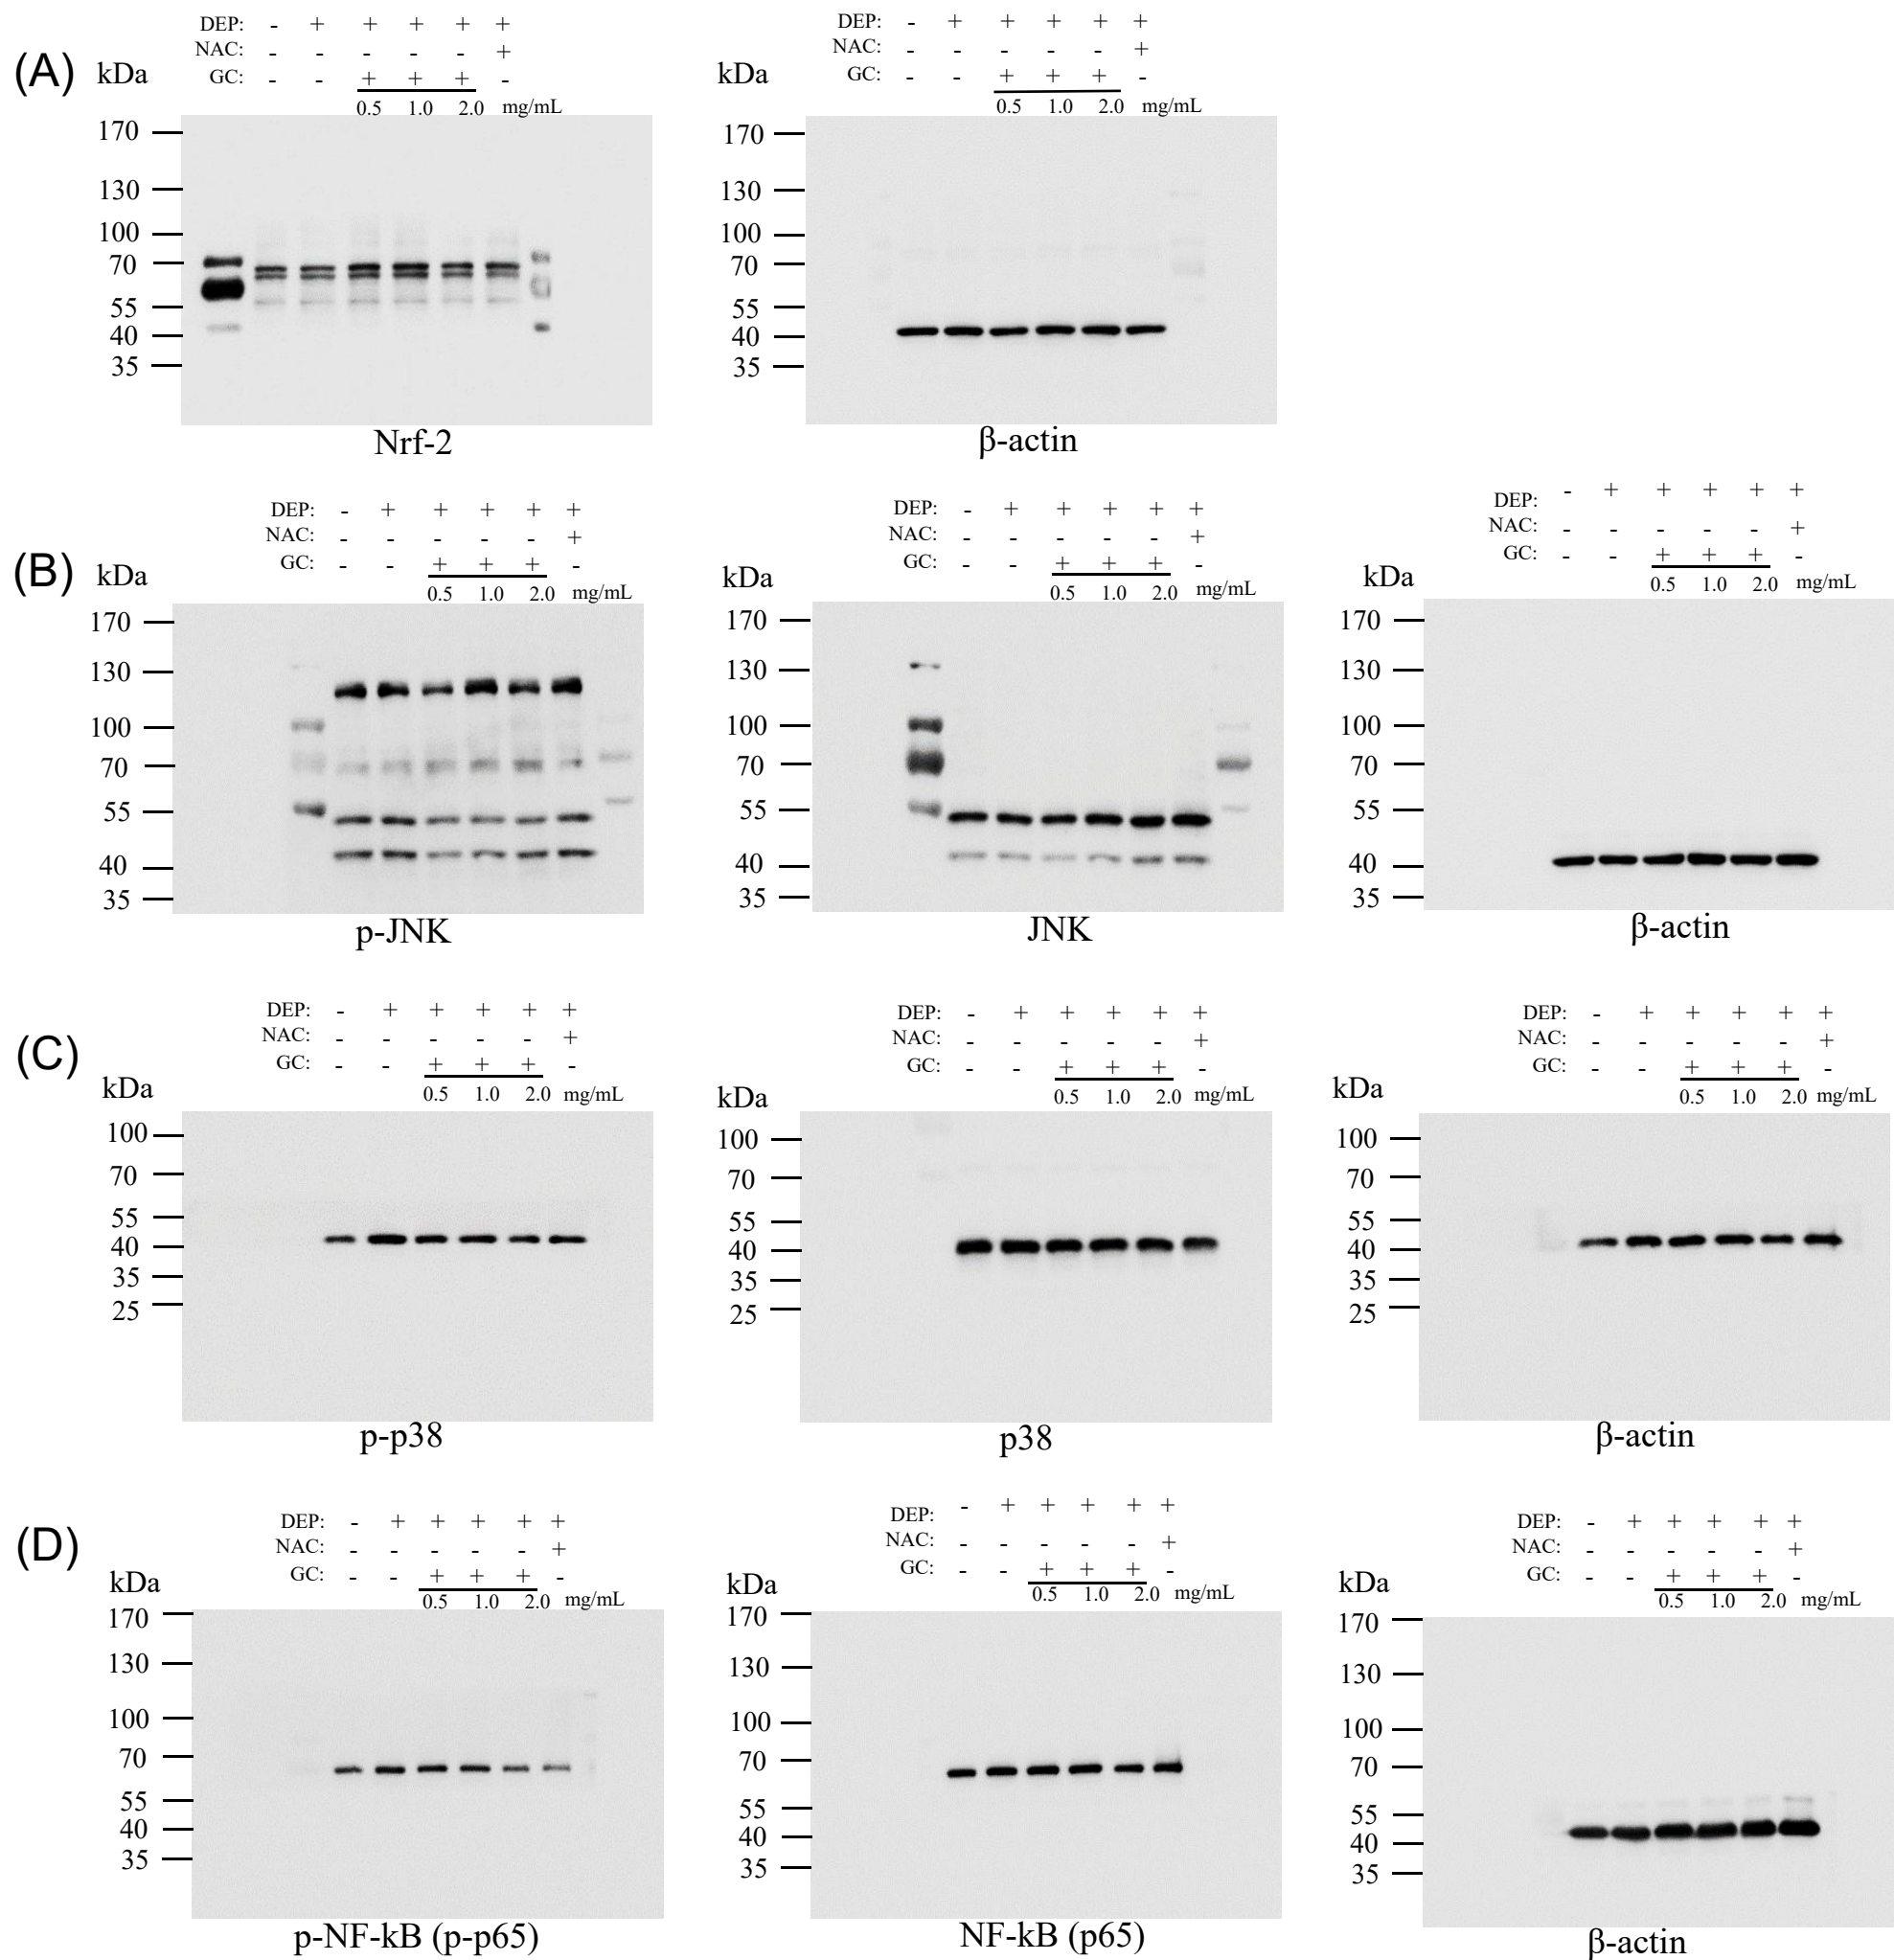

**Fig. S2:** Original data of western blots for Nrf-2 (A), p-JNK/JNK (B), p-P38/P38 (C) and p-NF-kB (p-p65)/ NF-kB (p65) (D).
